# Supplementary material for: Long-Term Renal Function after Catheter Ablation of Atrial Fibrillation
Source: MDPI journal article supplement (doi:10.3390/jcdd10040151), 2023-03-31
Supplement: s1 [file s1]

## Supplementary materials

**Table S1.** Prevalence of cardiovascular risk factors in patients with or without CKD at baseline

|                          | All patients, n=169 | Patients with CKD,<br>n=22 (13%) | Patients without CKD,<br>n=147 (87%) | P value |
|--------------------------|---------------------|----------------------------------|--------------------------------------|---------|
| Hypertension             | 117 (69.2%)         | 18 (81.8%)                       | 99 (67.3%)                           | 0.170   |
| Diabetes mellitus        | 17 (10.1%)          | 5 (22.7%)                        | 12 (8.2%)                            | 0.034*  |
| Congestive heart failure | 10 (5.9%)           | 3 (13.6%)                        | 7 (4.8%)                             | 0.100   |

Data are presented as numbers (percentages). CKD indicates chronic kidney disease.

**Table S2.** Changes in 5-year renal function in relation to the pre-ablation CT scan.

| Renal function                                     | Cardiac CT scan<br>before CA | Before CA | Post CA   | P value (Post CA<br>vs Before CA) | Δ (Post CA-<br>Before CA),<br>n (95% CI) | P value (CT<br>scan vs No CT<br>scan) |
|----------------------------------------------------|------------------------------|-----------|-----------|-----------------------------------|------------------------------------------|---------------------------------------|
| CKD-EPI eGFR,<br>ml/min per 1.73<br>m <sup>2</sup> | CT scan                      | 79.3±16.5 | 77.3±17.9 | 0.090                             | -2.0 (-4.3 to 0.3)                       | 0.942                                 |
|                                                    | No CT scan                   | 74.0±22.0 | 71.8±19.1 | 0.423                             | -2.2 (-7.8 to 3.4)                       |                                       |

Data are presented as mean ± 1 SD. CA indicates catheter ablation, CKD, chronic kidney disease; CKD-EPI, chronic kidney disease epidemiology collaboration; CT, computed tomography; eGFR, estimated glomerular filtration rate;

**Table S3.** Prevalence of cardiovascular risk factors in patients with or without CKD at 5-year follow-up

|                          | All patients, n=169 | Patients with CKD,<br>n=32 (18.9%) | Patients without CKD,<br>n=137 (81.1%) | P value |
|--------------------------|---------------------|------------------------------------|----------------------------------------|---------|
| Hypertension             | 125 (74%)           | 27 (84.4%)                         | 98 (71.5%)                             | 0.136   |
| Diabetes mellitus        | 23 (13.6%)          | 6 (18.8%)                          | 17 (12.4%)                             | 0.346   |
| Congestive heart failure | 14 (8.3%)           | 8 (25%)                            | 6 (4.4%)                               | <0.001* |

Data are presented as numbers (percentages). CKD indicates chronic kidney disease.

**Table S4.** Differences in clinical characteristics according to gender

|                                                            | All patients, n=169 | Male, n=104 (61.5%) | Female, n=65 (38.5%) | <i>P</i> value |
|------------------------------------------------------------|---------------------|---------------------|----------------------|----------------|
| Age, y                                                     | 59.6±10.1           | 57.9±9.5            | 62.3±10.4            | 0.005*         |
| BMI, kg/m <sup>2</sup>                                     | 27.1±4.0            | 27.1±3.2            | 27.0±5.1             | 0.886          |
| NPAF                                                       | 39 (23.1%)          | 24 (23.1%)          | 15 (23.1%)           | 1.000          |
| History of AF before CA, y                                 | 5.4±4.5             | 5.6±4.9             | 4.9±3.8              | 0.318          |
| Failed AADs, n                                             | 1.6±0.7             | 1.6±0.7             | 1.6±0.7              | 0.959          |
| Hypertension                                               | 117 (69.2%)         | 66 (63.5%)          | 51 (78.5%)           | 0.040*         |
| Diabetes mellitus                                          | 17 (10.1%)          | 9 (8.7%)            | 8 (12.3%)            | 0.442          |
| Congestive heart failure                                   | 10 (5.9%)           | 8 (7.7%)            | 2 (3.1%)             | 0.320          |
| Stroke                                                     | 12 (7.1%)           | 7 (6.7%)            | 5 (7.7%)             | 0.813          |
| Coronary artery disease                                    | 13 (7.7%)           | 10 (9.6%)           | 3 (4.6%)             | 0.374          |
| CHA2DS2-VASc score                                         | 1.8±1.3             | 1.3±1.2             | 2.6±1.1              | <0.001*        |
| baseline eGFR (CKD-EPI),<br>ml/min per 1.73 m <sup>2</sup> | 78.7±17.3           | 80.3±17.5           | 76.2±16.7            | 0.133          |
| CKD (GFR category≥ 3)                                      | 22 (13%)            | 11 (10.6%)          | 11 (16.9%)           | 0.233          |
| LA diameter, mm                                            | 41.6±4.8            | 42.6±4.3            | 39.9±5.2             | <0.001*        |
| LV EDD, mm                                                 | 52.7±4.3            | 54.1±4.1            | 50.6±3.8             | <0.001*        |
| LV EF, %                                                   | 59.7±7.3            | 59.4±7.6            | 60.0±6.8             | 0.569          |
| LV EF <50%                                                 | 13 (7.7%)           | 9 (8.7%)            | 4 (6.2%)             | 0.768          |
| LRAA after last CA                                         | 62 (36.7%)          | 33 (31.7%)          | 29 (44.6%)           | 0.091          |

Data are presented as mean ± 1 SD or as numbers (percentages). AADs indicates antiarrhythmic drugs; AF, atrial fibrillation; BMI, body mass index; CA, catheter ablation; CKD, chronic kidney disease; CKD-EPI, chronic kidney disease epidemiology collaboration; EDD, end-diastolic diameter; EF, ejection fraction; eGFR, estimated glomerular filtration rate; LA, left atrium; LRAA, late recurrence of atrial arrhythmia; LV, left ventricle; NPAF, nonparoxysmal atrial fibrillation; \**P*<0.05

**Table S5.** Differences in clinical characteristics based on the use of MRA during follow-up

|                                                         | All patients, n=169 | MRA during follow-up, n=16 (9.5%) | Without MRA during follow-up, n=153 (90.5%) | P value |
|---------------------------------------------------------|---------------------|-----------------------------------|---------------------------------------------|---------|
| Age, y                                                  | 59.6±10.1           | 60.5±11.8                         | 59.5±9.9                                    | 0.709   |
| Male patients                                           | 104 (61.5%)         | 7 (43.8%)                         | 97 (63.4%)                                  | 0.124   |
| BMI, kg/m <sup>2</sup>                                  | 27.1±4.0            | 28.6±5.1                          | 26.9±3.8                                    | 0.102   |
| NPAF                                                    | 39 (23.1%)          | 8 (50%)                           | 31 (20.3%)                                  | 0.007*  |
| History of AF before CA, y                              | 5.4±4.5             | 5.2±4.5                           | 5.4±4.5                                     | 0.863   |
| Failed AADs, n                                          | 1.6±0.7             | 1.4±0.5                           | 1.6±0.7                                     | 0.176   |
| Hypertension                                            | 117 (69.2%)         | 15 (93.8%)                        | 102 (66.7%)                                 | 0.024*  |
| Diabetes mellitus                                       | 17 (10.1%)          | 3 (18.8%)                         | 14 (9.2%)                                   | 0.206   |
| Congestive heart failure                                | 10 (5.9%)           | 4 (25%)                           | 6 (3.9%)                                    | 0.008*  |
| Stroke                                                  | 12 (7.1%)           | 1 (6.3%)                          | 11 (7.2%)                                   | 1.000   |
| Coronary artery disease                                 | 13 (7.7%)           | 4 (25%)                           | 9 (5.9%)                                    | 0.023*  |
| CHA2DS2-VASc score                                      | 1.8±1.3             | 2.8±1.2                           | 1.7±1.3                                     | 0.002*  |
| baseline eGFR (CKD-EPI), ml/min per 1.73 m <sup>2</sup> | 78.7±17.3           | 70.9±19.6                         | 79.5±16.9                                   | 0.057   |
| CKD (GFR category≥3)                                    | 22 (13%)            | 4 (25%)                           | 18 (11.8%)                                  | 0.231   |
| LV EF, %                                                | 59.7±7.3            | 52.4±11.0                         | 60.4±6.4                                    | 0.011*  |
| LV EF <50%                                              | 13 (7.7%)           | 6 (37.5%)                         | 7 (4.6%)                                    | <0.001* |
| LRAA after last CA                                      | 62 (36.7%)          | 7 (43.8%)                         | 55 (35.9%)                                  | 0.538   |
| Loop diuretics                                          | 21 (12.4%)          | 13 (81.3%)                        | 8 (5.2%)                                    | <0.001* |

Data are presented as mean ± 1 SD or as numbers (percentages). AADs indicates antiarrhythmic drugs; AF, atrial fibrillation; BMI, body mass index; CA, catheter ablation; CKD, chronic kidney disease; CKD-EPI, chronic kidney disease epidemiology collaboration; EF, ejection fraction; eGFR, estimated glomerular filtration rate; LRAA, late recurrence of atrial arrhythmia; LV, left ventricle; NPAF, nonparoxysmal atrial fibrillation; \*P<0.05

**Table S6.** Differences in clinical characteristics in relation to the type of OAC during follow-up

|                                                            | VKA during follow-up,<br>n=44 | DOAC during<br>follow-up, n=62 | P value |
|------------------------------------------------------------|-------------------------------|--------------------------------|---------|
| Age, y                                                     | 61.5±8.2                      | 62.8±8.8                       | 0.446   |
| Male patients                                              | 26 (59.1%)                    | 32 (51.6%)                     | 0.446   |
| BMI, kg/m <sup>2</sup>                                     | 27.1±4.0                      | 28.0±4.1                       | 0.247   |
| NPAF                                                       | 16 (36.4%)                    | 16 (25.8%)                     | 0.243   |
| History of AF before CA, y                                 | 6.5±5.4                       | 4.7±4.0                        | 0.065   |
| Failed AADs, n                                             | 1.7±0.6                       | 1.6±0.7                        | 0.573   |
| Hypertension                                               | 33 (75%)                      | 44 (71%)                       | 0.646   |
| Diabetes mellitus                                          | 5 (11.4%)                     | 8 (12.9%)                      | 0.812   |
| Congestive heart failure                                   | 3 (6.8%)                      | 3 (4.8%)                       | 0.691   |
| Stroke                                                     | 5 (11.4%)                     | 5 (8.1%)                       | 0.567   |
| Coronary artery disease                                    | 4 (9.1%)                      | 6 (9.7%)                       | 1.000   |
| CHA <sub>2</sub> DS <sub>2</sub> -VASc score               | 2.0±1.3                       | 2.2±1.4                        | 0.469   |
| baseline eGFR (CKD-EPI),<br>ml/min per 1.73 m <sup>2</sup> | 77.6±16.6                     | 73.2±16.2                      | 0.182   |
| CKD (GFR category≥ 3)                                      | 5 (11.4%)                     | 11 (17.7%)                     | 0.366   |
| LA diameter, mm                                            | 43.0±4.5                      | 42.3±4.8                       | 0.452   |
| LV EDD, mm                                                 | 52.8±5.1                      | 52.8±4.1                       | 0.964   |
| LV EF, %                                                   | 57.8±7.1                      | 60.2±7.2                       | 0.092   |
| LV EF <50%                                                 | 3 (6.8%)                      | 6 (9.7%)                       | 0.732   |
| LRAA after last CA                                         | 24 (54.5%)                    | 32 (51.6%)                     | 0.766   |
| Amiodarone                                                 | 19 (43.2%)                    | 21 (33.9%)                     | 0.330   |
| Propafenone                                                | 10 (22.7%)                    | 14 (22.6%)                     | 0.986   |
| Flecainide                                                 | 7 (15.9%)                     | 21 (33.9%)                     | 0.039*  |
| ACEi/ARB                                                   | 29 (65.9%)                    | 43 (69.4%)                     | 0.708   |
| Thiazide diuretics                                         | 5 (11.8%)                     | 19 (30.6%)                     | 0.019*  |
| Loop diuretics                                             | 8 (18.2%)                     | 10 (16.1%)                     | 0.782   |
| MRA                                                        | 7 (15.9%)                     | 6 (9.7%)                       | 0.335   |
| statins                                                    | 16 (36.4%)                    | 21 (33.9%)                     | 0.791   |

Data are presented as mean ± 1 SD or as numbers (percentages). AADs indicates antiarrhythmic drugs; ACEi, angiotensin-converting enzyme inhibitors; AF, atrial fibrillation; ARB, angiotensin receptor blockers; BMI, body mass index; CA, catheter ablation; CKD, chronic kidney disease; CKD-EPI, chronic kidney disease epidemiology collaboration; DOAC, direct oral anticoagulants; EDD, end-diastolic diameter; EF, ejection fraction; eGFR, estimated glomerular filtration rate; LA, left atrium; LRAA, late recurrence of atrial arrhythmia; LV, left ventricle; MRA, mineralocorticoid receptor antagonists; NPAF, nonparoxysmal atrial fibrillation; OAC, oral anticoagulants; VKA, vitamin K antagonists; \**P*<0.05
